# Supplementary material for: Usage of and satisfaction with Integrated Community Case Management care in western Uganda: a cross-sectional survey
Source: Springer Nature journal article supplement (doi:10.1186/s12936-021-03601-9), 2021-01-30
Supplement: MOESM1 [file 18814482]

**2016 BIMI household survey**

*Interviewers: Please circle only 1 answer per question unless otherwise specified. Please choose “No response” if respondent unsure, unwilling, or unable to answer the question. Each question is to be read the participant as written.*

**A. SURVEY INFORMATION**

101

| Interviewer | Data entry 1 | Data entry 2 | Data review |
|-------------|--------------|--------------|-------------|
| Name:       | Name:        | Name:        | Name:       |
| ID:         | ID:          | ID:          | ID:         |
| Date:       | Date:        | Date:        | Date:       |
| Time:       | Time:        | Time:        | Time:       |

102 Village:

- a. Bugoye
- b. Ihani
- c. Kanyaminigo
- d. Kikokera
- e. Muramba 1
- f. Ndugutu East
- g. Rwakingi 1B
- h. Ruboni

103 House Number

|  |  |  |  |  |
|--|--|--|--|--|
|  |  |  |  |  |
|--|--|--|--|--|

104 Head of household name: \_\_\_\_\_

105 Visit to household

- a. First attempt
- b. Second attempt

106 Consent

- a. Obtained
- b. Refused (STOP, GO TO NEXT HOUSEHOLD)
- c. No respondent at household (STOP, GO TO NEXT HOUSEHOLD)

**B. HOUSEHOLD INFORMATION**

*READ: We will start with some basic questions about you and the members of your household.*

- 201 What language would you prefer for the survey:  
a. Lukonjo  
b. English
- 202 Are you the head of the household:  
a. Yes  
b. No (GO TO QUESTION 207)
- 203 Respondent age: \_\_\_\_\_ years (Use “999” if does not desire to share age)
- 204 Respondent gender  
a. Male  
b. Female
- 205 Respondent occupation (circle only primary occupation)  
a. Farmer (ie. “peasant farmer”)  
b. Business  
c. Teacher  
d. Medical  
e. Driver  
f. Government worker  
g. Other (please specify): \_\_\_\_\_  
h. No response
- 206 Respondent highest education completed:  
a. No formal education/less than P1  
b. Some primary school (P1-P7)  
c. All primary school (completed P7)  
d. Some secondary school (S1-S4)  
e. Completed ordinary secondary school (completed S4)  
f. Some advanced secondary school (S4-S6)  
g. All advanced secondary school (completed S6)  
h. Some tertiary school  
i. Tertiary certificate, diploma, or degree  
j. No response

(GO TO QUESTION 215)

- 207 Head of household age: \_\_\_\_\_ years
- 208 Head of household gender
- a. Male
  - b. Female
- 209 Head of household occupation (circle only primary occupation)
- a. Farmer
  - b. Business
  - c. Teacher/Education
  - d. Medical
  - e. Driver
  - f. Government
  - g. Other (please specify: \_\_\_\_\_)
  - h. No response
- 210 Head of household highest education completed :
- a. No formal education/less than P1
  - b. Some primary school (P1-P7)
  - c. All primary school (completed P7)
  - d. Some secondary school (S1-S4)
  - e. Completed ordinary secondary school (completed S4)
  - f. Some advanced secondary school (S4-S6)
  - g. All advanced secondary school (completed S6)
  - h. Some tertiary school
  - i. Tertiary certificate, diploma, or degree
  - j. No response
- 211 Respondent's relationship to head of household:
- a. Spouse
  - b. Parent
  - c. Grandparent
  - d. Child
  - e. Grandchild
  - f. Sibling
  - g. Friend
  - h. Other family
  - i. Other (please specify): \_\_\_\_\_
  - j. No response
- 212 Respondent's age: \_\_\_\_\_ years
- 213 Respondent gender
- a. Male
  - b. Female

- 214 Respondent highest education completed:
- a. No formal education/less than P1
  - b. Some primary school (P1-P7)
  - c. All primary school (completed P7)
  - d. Some secondary school (S1-S4)
  - e. Completed ordinary secondary school (completed S4)
  - f. Some advanced secondary school (S4-S6)
  - g. All advanced secondary school (completed S6)
  - h. Some University
  - i. University Degree
  - j. No response
- 215 How many people, including yourself, live in your household? Please include all children and infants. Please do not include guests who do not live here regularly.
- \_\_\_\_\_
- 216 How many children under the age of 5 years live in your household? Please include all children and infants. Please do not include guests who do not live here regularly.
- \_\_\_\_\_
- 217 On average, what is the total monthly income of the members of this household?
- a. 100,000 or less UGX
  - b. 100,001-200,000 UGX
  - c. 200,001-300,000 UGX
  - d. 300,001-400,000 UGX
  - e. 400,001-500,000 UGX
  - f. 500,001-600,000 UGX
  - g. 600,001-700,000 UGX
  - h. 700,001-800,000 UGX
  - i. 800,001-900,000 UGX
  - j. 900,001-1,000,000 UGX
  - k. More than 1,000,000 UGX
- 218 Do you have a mobile phone?
- a. Yes
  - b. No
  - c. No response
- 219 Does your household have electricity?
- a. Yes
  - b. No
  - c. No response

- 220 What is the main source of drinking water for members of your household?
- Piped water to dwelling or plot
  - Public tap or standpipe
  - Open well or spring in yard or plot
  - Open public well or spring
  - Protected well or spring in yard or plot
  - Protected public well or spring
  - Borehole in yard or plot
  - Public borehole
  - Surface water (river/lake/dam)
  - Rain water
  - Tanker truck
  - Vendor
  - Bottled water
  - Other (specify) \_\_\_\_\_
  - No response
- 221 How many minutes does it take to get to the main source of drinking water, retrieve the water, and return home?
- 0-10 mins
  - 11-20 mins
  - 21-30 mins
  - 31-45 mins
  - 46-60 mins
  - More than 60 mins
  - No response
- 222 What type of container do you primarily use to store water in?
- Jerry can
  - Bucket with lid
  - Bucket without lid
  - Pots or saucepan
  - Other (specify): \_\_\_\_\_
  - No response
- 223 What kind of toilet facility do members of your household usually use?
- Flush toilet
  - Vip latrine
  - Covered pit latrine no concrete slab
  - Covered pit latrine with concrete slab
  - Uncovered pit latrine no concrete slab
  - Uncovered pit latrine with concrete slab
  - Composting toilet or EcoSan
  - Bush (GO TO QUESTION 226)
  - Other (specify) \_\_\_\_\_
  - No response

- 224 Do you share this toilet facility with other households?
- a. Yes
  - b. No (GO TO QUESTION 226)
  - c. No response (GO TO QUESTION 226)
- 225 How many households use this toilet facility? (write 99 if does not know) \_\_\_\_\_
- 226 In a typical week, on how many days do you eat meat?
- a. 0 days
  - b. 1-2 days
  - c. 3-5 days
  - d. 6-7 days
  - e. No response
- 227 How often in the past 6 months did you have problems satisfying the food needs of the household?
- a. Never
  - b. Seldom
  - c. Sometimes
  - d. Often
  - e. Always
  - f. No response
-

**C. HEALTH AND HEALTHCARE INFORMATION**

*READ: Now I would like to talk about the health care your family receives.*

- 301 To the nearest kilometer, approximately how far do you think it is to the nearest health center?
- Less than 1 km
  - 1 km
  - 2 km
  - 3 km
  - 4 km
  - 5 or more km
  - No response
- 302 What is the name of that health facility?
- Bugoye Health Center III
  - Ibanda Health Center II
  - Kilembe Mines Hospital
  - Rwenzori mountaineering services (RMS)
  - Bishop Masereka Medical Centre
  - St. Paul Health Centre
  - Kasese Town Council Clinic
  - Manasi's Clinic
  - Afiya Camiri Clinic
  - Kasese Moslem Health III
  - Alleluya Medical Centre
  - Kasese Medical Centre
  - Other: \_\_\_\_\_
  - No response
- 303 Is this health facility, the primary site you would go to if you or a family member are in need of medical care?
- Yes (GO TO QUESTION 305)
  - No
- 304 To which health facility would you go if you or a family member were in need of medical care?
- Bugoye Health Center III
  - Ibanda Health Center II
  - Kilembe Mines Hospital
  - Rwenzori mountaineering services (RMS)
  - Bishop Masereka Medical Centre
  - St. Paul Health Centre
  - Kasese Town Council Clinic
  - Manasi's Clinic
  - Afiya Camiri Clinic
  - Kasese Moslem Health III
  - Alleluya Medical Centre
  - Kasese Medical Centre
  - Other: \_\_\_\_\_

n. No response

- 305 What is your primary means of transport to the health facility?
- Private car or motorcycle
  - Hired care or motorcycle
  - Animal or animal cart
  - Walking
  - Bicycle
  - Other (specify): \_\_\_\_\_
  - No response
- 306 Do you spend any money on transport to the health facility?
- Yes
  - No (GO TO QUESTION 308)
  - No response (GO TO QUESTION 308)
- 307 If you spend money on transport to get to the health facility, how much do you usually spend for a one-way trip?
- 0-2000 UGX
  - 2001-5000 UGX
  - 5001-10,000 UGX
  - 10,001-20,000 UGX
  - More than 20,000 UGX
  - No response
- 308 How much time do you typically spend getting to that health facility for a 1-way trip? Please include waiting time for transport.
- Less than half hour
  - 30-59 minutes
  - 1-1 hour 59 mins
  - 2-2 hours 59 mins
  - 3-3 hours 59 mins
  - 4 or more hours
  - No response
- 309 In the past year, has there been a time when a child in your household was sick, and you thought the child needed treatment, but you were not able to seek treatment at a health facility?
- Yes
  - No (GO TO QUESTION 311)
  - No response (GO TO QUESTION 311)
- 310 In that situation, what was the main reason that you could not go to the health facility for treatment for your child?
- Lack of money
  - Lack of time
  - Lack of trust in provider
  - Lack of transport



- e. Lack of approval by spouse
- f. Health center without medications
- g. Other (specify): \_\_\_\_\_
- h. No response

*READ: Now I would like to ask you a few more questions about all of the children under 5 years of age who lived in your household over the past year.*

- 311 Have any children under 5 years of age who lived in your household died in the past year?
- a. Yes
  - b. No (GO TO QUESTION 314)
  - c. No response (GO TO QUESTION 314)

312 How many children under 5 years of age died in the last year (12 months)? \_\_\_\_\_

313 Fill out for each child who died <5 years old.

- a. **Child #1**
  - b. How old was **Child #1**:
    - 1. <1 month
    - 2. ≥1 month – 11 months
    - 3. 1 year old
    - 4. 2 years old
    - 5. 3 years old
    - 6. 4 years old
  - c. What do you believe **Child 1** died from:
    - 1. Malaria
    - 2. Pneumonia
    - 3. Diarrhea
    - 4. Unknown
    - 5. Other (specify): \_\_\_\_\_
- d. **Child #2**
  - e. How old was **Child #2**:
    - 1. <1 month
    - 2. ≥1 month – 11 months
    - 3. 1 year old
    - 4. 2 years old
    - 5. 3 years old
    - 6. 4 years old
  - f. What do you believe **Child 2** died from:
    - 1. Malaria
    - 2. Pneumonia
    - 3. Diarrhea
    - 4. Unknown
    - 5. Other (specify): \_\_\_\_\_
- g. **Child #3**
  - h. How old was **Child #3**:
    - 1. <1 month
    - 2. ≥1 month – 11 months

3. 1 year old
  4. 2 years old
  5. 3 years old
  6. 4 years old
- i. What do you believe **Child 3** died from:
1. Malaria
  2. Pneumonia
  3. Diarrhea
  4. Unknown
  5. Other (specify): \_\_\_\_\_

*READ: Now I would like to ask more about your experience of getting healthcare for your children.*

- 314 When one of your children under 5 years old has been sick, have you ever taken your child to see the VHT?
- a. Yes
  - b. No (GO TO QUESTION 328)
  - c. No response (GO TO QUESTION 328)

*READ: Thinking of the last time you took a sick child under 5 years old to see the VHT.*

- 315 When you decided to take your child to see the VHT, was the VHT available promptly?
- a. Yes
  - b. No
  - c. No response

- 316 Were you able to see the VHT within 4 hours of deciding your child needed to be seen?
- a. Yes
  - b. No
  - c. No response

- 317 How would you rate experience of being **treated with respect** by the VHT?
- a. Unacceptable
  - b. Not very good
  - c. Acceptable
  - d. Above average
  - e. Excellent
  - f. No response

- 318 How was your experience of **communication** with the VHT while he/she was caring for your child?
- a. Unacceptable
  - b. Not very good
  - c. Acceptable
  - d. Above average
  - e. Excellent
  - f. No response

- 319 How would rate this experience of the VHT caring for your child?
- a. Poor
  - b. Fair
  - c. Good
  - d. Very good
  - e. Excellent
  - f. No response
- 320 Was your child was referred to a health centre by a VHT for further treatment?
- a. Yes
  - b. No (GO TO QUESTION 324)
  - c. No response (GO TO QUESTION 324)
- 321 Did you take the child to the health centre?
- a. Yes
  - b. No (GO TO QUESTION 323)
  - c. No response (GO TO QUESTION 324)
- 322 When did you go to the health centre?
- a. Within 1 day of referral
  - b. Within 2-3 days of referral
  - c. Within 1 week
  - d. After more than 1 week
  - e. Never
  - f. No response
- (GO TO QUESTION 324)
- 323 Why did you not go to the health centre?
- a. Lack of money
  - b. Lack of time
  - c. Lack of trust in provider
  - d. Lack of transport
  - e. Lack of approval by spouse
  - f. Health center without medications
  - g. Other (specify): \_\_\_\_\_
  - h. No response
- 324 In the past month, has any child under 5 years old in this household been assessed by a VHT?
- a. Yes
  - b. No (GO TO QUESTION 328)
  - c. No response (GO TO QUESTION 328)
- 325 If yes, how many times have in the past month has a child under 5 years old been assessed by a VHT? \_\_\_\_\_

- 326 In the past month, how many times did a VHT assess any child under 5 years old in your household and refer the child on to the health centre?  
\_\_\_\_\_
- 327 If your child was referred to a health centre by a VHT for treatment, did you take the child to the health centre?
- a. Every time
  - b. Most of the times
  - c. Sometimes
  - d. Never
  - e. No response
- 328 How many times in the past month has a member of your household visited a health center for a child under 5 years old? (enter 99 if does not know)  
\_\_\_\_\_
- 329 If your child is sick and you think they need treatment, where do you usually go first?
- a. Health centre
  - b. VHT
  - c. Traditional medical practitioner
  - d. Drug Shop
  - e. Other (specify): \_\_\_\_\_
  - f. No response
- 330 How often do you contact your VHT if a child is sick?
- a. Rarely
  - b. Sometimes
  - c. Most of the time
  - d. Every time
  - e. No response
- 331 How do you usually contact your VHT if a child is sick?
- a. Phone/SMS
  - b. Go to VHT's house
  - c. Send someone to get VHT to bring to your household
  - d. Other: \_\_\_\_\_
  - e. No response
- 332 Have you ever had a sick child and been unable to find a VHT?
- a. Yes
  - b. No
  - c. No response
- 333 How would you rate your overall experience with VHTs in the past?
- a. Unacceptable
  - b. Not very good
  - c. Acceptable
  - d. Above average

- e. Excellent
- f. No response

- 334 How confident are you in the abilities of the VHT?
- a. Not confident
  - b. Somewhat confident
  - c. Confident
  - d. Very confident
  - e. No response
- 335 How confident are you in the abilities of the VHT to manage **cough**?
- a. Not confident
  - b. Somewhat confident
  - c. Confident
  - d. Very confident
  - e. No response
- 336 How confident are you in the abilities of the VHT to manage **diarrhea**?
- a. Not confident
  - b. Somewhat confident
  - c. Confident
  - d. Very confident
  - e. No response
- 337 How confident are you in the abilities of the VHT in the manage **fever**?
- a. Not confident
  - b. Somewhat confident
  - c. Confident
  - d. Very confident
  - e. No response
- 338 Would you have your child seen by a VHT in the future if he or she had a health problem?
- a. Yes
  - b. No
  - c. No response
-

**D. MALARIA, PNEUMONIA, AND DIARRHEA IN THE COMMUNITY**

*READ: Now I would like to ask you some questions about malaria, pneumonia, and diarrhea in the community.*

- 401 How serious a problem is pneumonia in this community?
- Not a problem
  - A minor problem
  - A major problem
  - The most important health problem
  - No response
- 402 How serious a problem is diarrhea in this community?
- Not a problem
  - A minor problem
  - A major problem
  - The most important health problem
  - No response
- 403 How serious a problem is malaria in this community?
- Not a problem
  - A minor problem
  - A major problem
  - The most important health problem
  - No response
- 404 Do VHTS in your community currently have medicines available to treat children who are sick?
- Yes
  - No
  - No response
- 405 Does your household have any mosquito nets that can be used while sleeping?
- Yes
  - No (GO TO QUESTION 419)
  - Don't know (GO TO QUESTION 419)
- 406 How many mosquito nets does your household have? \_\_\_\_\_

(Ask each question for each net, going through each question in order for the first net, then the second and third, until you have discussed all nets. Make sure to complete all the numbered questions – numbers 407 - 418).

| Question                                         | Net 1                | Net 2                | Net 3                |
|--------------------------------------------------|----------------------|----------------------|----------------------|
| May I have a look at each of your mosquito nets? | 407. Net 1 observed? | 411. Net 2 observed? | 415. Net 3 observed? |

|                                                                                                                                                                                          | <b>1 Yes / 2 No</b>                                                                        | <b>1 Yes / 2 No</b>                                                                        | <b>1 Yes / 2 No</b>                                                                        |
|------------------------------------------------------------------------------------------------------------------------------------------------------------------------------------------|--------------------------------------------------------------------------------------------|--------------------------------------------------------------------------------------------|--------------------------------------------------------------------------------------------|
| <p>(If you're able to observe the net, the net in good or poor condition?</p> <p>If you are not able to observe the net, ask the respondent: "Is the net in good or poor condition?"</p> | <p>408. Net 1 holes?</p> <p><b>1. Good</b><br/><b>2. Poor</b><br/><b>3. Don't know</b></p> | <p>412. Net 2 holes?</p> <p><b>1. Good</b><br/><b>2. Poor</b><br/><b>3. Don't know</b></p> | <p>416. Net 3 holes?</p> <p><b>1. Good</b><br/><b>2. Poor</b><br/><b>3. Don't know</b></p> |
| <p>Did you purchase this mosquito net or were you given it for free (without cost)?</p>                                                                                                  | <p>409. Net 1</p> <p><b>1. Purchased</b><br/><b>2. Given for free</b></p>                  | <p>413. Net 2</p> <p><b>1. Purchased</b><br/><b>2. Given for free</b></p>                  | <p>417. Net 3</p> <p><b>1. Purchased</b><br/><b>2. Given for free</b></p>                  |
| <p>How many children under 5 years slept under this net last night?</p>                                                                                                                  | <p>410. Net 1 children under 5:<br/>_____</p>                                              | <p>414. Net 2 children under 5:<br/>_____</p>                                              | <p>418. Net 3 children under 5:<br/>_____</p>                                              |

*(If there are more than 3 nets, use the additional net sheet)*

419 In your opinion, what causes malaria? (Do not read list; circle ALL answers given)

- a. Mosquito bites
- b. Eating matooke
- c. Eating maize
- d. Eating mangoes
- e. Eating dirty food
- f. Drinking unboiled water
- g. Getting soaked with rain
- h. Cold/changing weather
- i. Witchcraft
- j. Contact with infected person
- k. Other (specify) \_\_\_\_\_
- l. No response

420 What is the main way that you learn about health problems such as malaria?

- a. Family, friends, or other community members
- b. Community meetings
- c. VHT
- d. Health center and staff
- e. Radio/television
- f. Newspaper or magazine
- g. Other (specify): \_\_\_\_\_
- h. No response

BIMI Survey number: \_\_\_\_\_

---



**E. WOMEN'S HEALTH**

*READ: Now I would like to ask you some questions about women's health and child bearing. We want to re-iterate that all responses are completely private and that you do not need to answer any question that with which you are uncomfortable.*

501 Is it okay to proceed with questions about this area?

- a. Yes
- b. No (GO TO QUESTION 601)

502 How many pregnant women are currently in your household? \_\_\_\_\_

(If "0", GO TO QUESTION 504)

503 How many pregnant women slept under a mosquito net last night? \_\_\_\_\_

{If respondent is NOT a woman, please go to question 529}

504 Are you pregnant currently?

- a. Yes
- b. No (GO TO QUESTION 512)
- c. No response (GO TO QUESTION 512)

505 When was you last menstrual period? \_\_/\_\_/\_\_ (DD/MM/YYYY)

506 How many antenatal care appointments have you attended for this pregnancy? \_\_\_\_\_

(If "0" antenatal care appointments, go to question 509)

507 Where did you go for antenatal care? (CIRCLE ALL THAT APPLY)

- a. Health centre
- b. Traditional birth attendant
- c. Drug shop
- d. Other: \_\_\_\_\_
- e. No response

508 Who attended the antenatal care with you? (CIRCLE ALL THAT APPLY)

- a. Spouse
- b. Mother
- c. Mother-in-law
- d. Other family: \_\_\_\_\_
- e. Friend
- f. No one else, attended alone
- g. No response

509 Are you planning on attend any further antenatal care at a health centre?

- a. Yes
- b. No

c. No response

- 510 Where do you plan to give birth?
- a. Health centre 2 (GO TO QUESTION 512)
  - b. Health centre 3 (GO TO QUESTION 512)
  - c. Health centre 4 (GO TO QUESTION 512)
  - d. District hospital (GO TO QUESTION 512)
  - e. Private hospital/clinic (GO TO QUESTION 512)
  - f. Your Home
  - g. Another's home
  - h. No response (GO TO QUESTION 512)
- 511 Who will assist you to deliver the baby in the home?
- a. Traditional birth attendant
  - b. Family member
  - c. Health center staff
  - d. No one
  - e. Other: \_\_\_\_\_
  - f. No response
- 512 Have you ever been pregnant before in the past?
- a. Yes
  - b. No (GO TO QUESTION 524)
  - c. No response (GO TO QUESTION 524)
- 513 How many live births have you had? \_\_\_\_\_
- 514 What was your age at the time of your first pregnancy? \_\_\_\_\_
- 515 How many times have you been pregnant previously? \_\_\_\_\_
- 516 In the past where have you given birth: (CIRCLE ALL THAT APPLY)
- a. Health centre 2
  - b. Health centre 3
  - c. Health centre 4
  - d. District hospital
  - e. Private hospital/clinic
  - f. Your Home
  - g. Another's home
  - h. No response
- 517 With the most recent delivery, where did you give birth:
- a. Health centre 2
  - b. Health centre 3
  - c. Health centre 4
  - d. District hospital
  - e. Private hospital/clinic
  - f. Your Home

- g. Another's home
- h. No response

- 518 If not at your home, who accompanied you to the site of the delivery?
- a. Spouse
  - b. Mother
  - c. Mother-in-law
  - d. Other family: \_\_\_\_\_
  - e. Friend
  - f. No one else, attended alone
  - g. Delivered at my home
  - h. No response
- 519 Who assisted you to deliver the baby in the home?
- a. Traditional birth attendant
  - b. Family member
  - c. Health center staff
  - d. No one
  - e. Other: \_\_\_\_\_
  - f. No response
- 520 If you did not deliver at a health facility, why did you not go to the health facility?
- a. Lack of time
  - b. Lack of money
  - c. Personal preference (you rather be at home)
  - d. Other family members' preference including spouse, mother-in-law, or mother
  - e. Other: \_\_\_\_\_
  - f. No response
- 521 If you delivered at a health facility, was the delivery:
- a. Vaginal delivery
  - b. C-section
- 522 Did any health worker visit you after delivery?
- a. VHT
  - b. Traditional birth attendant
  - c. Health center staff member
  - d. Other: \_\_\_\_\_
  - e. No response
- 523 How many living children do you have? \_\_\_\_\_
- 524 How many children do you desire to have in your whole life? \_\_\_\_\_
- 525 How many children do you think your current partner desires to have in his life? \_\_\_\_\_

- 526 If you desire to have more children, would you want to have another child in the next 12 months?
- a. Yes
  - b. No
  - c. Undecided
  - d. No response
- 527 Have any women from this household died during child birth in the last year (12 months)?
- a. Yes
  - b. No
  - c. No response
- 528 What is the main way that you learn about women's health including pregnancy, delivery, and contraception?
- a. Family, friends, or other community members
  - b. Traditional birth attendants
  - c. Health center and staff
  - d. Community meetings
  - e. VHT
  - f. Health center and staff
  - g. Radio/television
  - h. Newspaper or magazine
  - i. Other (specify): \_\_\_\_\_
  - j. No response

(PLEASE GO TO QUESTION 601)

*FOR MEN*

- 529 Is your partner currently pregnant?
- a. Yes
  - b. No (GO TO QUESTION 532)
  - c. No response (GO TO QUESTION 532)
- 530 During this pregnancy, has she attended antenatal care?
- a. Yes
  - b. No
  - c. Do not know
  - d. No response
- 531 During this pregnancy, have you attended any antenatal care appointments with her?
- a. Yes
  - b. No
  - c. Do not know
  - d. No response
- 532 How many times has your partner been pregnant previously? \_\_\_\_\_

(If "0", GO TO QUESTION 539)

- 533 In the past, when pregnant, did she attend antenatal care?
- Yes
  - No
  - Do not know
  - No response
- 534 Did you attend any antenatal care appointments with her?
- Yes
  - No
  - No response
- 535 In the past where has your partner given birth? (Circle all that apply)
- Health centre 2
  - Health centre 3
  - Health centre 4
  - District hospital
  - Private hospital/clinic
  - Your Home
  - Another's home
  - Do not know
  - No response
- 536 With the most recent delivery, where did your partner give birth:
- Health centre 2
  - Health centre 3
  - Health centre 4
  - District hospital
  - Private hospital/clinic
  - Your Home
  - Another's home
- 537 If delivered at home, who assisted her to deliver the baby in the home?
- Traditional birth attendant
  - Family member
  - Health center staff
  - No one
  - Other: \_\_\_\_\_
  - No response
- 538 If she did not deliver at a health facility, why did she not go to the health facility?
- Lack of time
  - Lack of money
  - Personal preference (you rather be at home)
  - Other family members' preference including spouse, mother-in-law, or mother
  - Other: \_\_\_\_\_
  - No response

- 539 How many children do you want to have in your whole life? \_\_\_\_\_
- 540 How many children do you think your current partner desires to have in her life? \_\_\_\_\_
- 541 If you desire to have more children, would you want to have another child in the next 12 months?
- a. Yes
  - b. No
  - c. No response
- 542 Have any women from this household died during child birth in the last year (12 months)?
- a. Yes
  - b. No
  - c. No response
-

**F. NONCOMMUNICABLE DISEASES**

*READ: Now, in this last section, I am going to ask you a few questions about some chronic diseases such as heart disease and risk factors for their development.*

- 601 Do you currently smoke or use any tobacco products such as cigarettes, pipes, or chewing tobacco?
- Yes
  - No (GO TO QUESTION 604)
  - No response (GO TO QUESTION 604)
- 602 In the past 12 months, what types of tobacco have you used? (Circle all that apply)
- Cigarettes
  - Pipes
  - Smokeless tobacco (ie. Chewing tobacco)
  - No response
- 603 In the past 12 months, how frequently have you used tobacco?
- Daily
  - 5-6 days per week
  - 1-4 days per week
  - 1-3 days per month
  - Less than once a month
  - No response
- 604 Does anyone else in your household use any tobacco products such as cigarettes, pipes, or chewing tobacco?
- Yes
  - No
  - No response
- 605 Have you consumed alcohol (beer, wine, spirits) in the last 12 months?
- Yes
  - No (GO TO QUESTION 607)
  - No response
- 606 In the past 12 months, how frequently have you had at least 1 drink of alcohol?
- Daily
  - 5-6 days per week
  - 1-4 days per week
  - 1-3 days per month
  - Less than once a month
- 607 How many people in your household have been diagnosed with the following conditions:
- Hypertension? \_\_\_\_\_
  - Heart disease? \_\_\_\_\_
  - Diabetes? \_\_\_\_\_
  - Asthma? \_\_\_\_\_

BIMI Survey number: \_\_\_\_\_

- e. Stroke? \_\_\_\_\_
- f. Depression? \_\_\_\_\_
- g. Seizures? \_\_\_\_\_

***THANK YOU FOR PARTICIPATING IN OUR SURVEY!***



**F) Additional net sheet**

| Question                                                                                                                                                                           | Net 1                                                                 | Net 2                                                                 | Net 3                                                                 |
|------------------------------------------------------------------------------------------------------------------------------------------------------------------------------------|-----------------------------------------------------------------------|-----------------------------------------------------------------------|-----------------------------------------------------------------------|
| May I have a look at each of your mosquito nets?                                                                                                                                   | 450. Net 1 observed?<br><br><b>1 Yes / 2 No</b>                       | 454. Net 2 observed?<br><br><b>1 Yes / 2 No</b>                       | 458. Net 3 observed?<br><br><b>1 Yes / 2 No</b>                       |
| (If you're able to observe the net, the net in good or poor condition?<br><br>If you are not able to observe the net, ask the respondent: "Is the net in good or poor condition?") | 451. Net 1 holes?<br><br><b>1. Good<br/>2. Poor<br/>3. Don't know</b> | 455. Net 2 holes?<br><br><b>1. Good<br/>2. Poor<br/>3. Don't know</b> | 459. Net 3 holes?<br><br><b>1. Good<br/>2. Poor<br/>3. Don't know</b> |
| Did you purchase this mosquito net or were you given it for free (without cost)?                                                                                                   | 452. Net 1<br><br><b>1. Purchased<br/>2. Given for free</b>           | 456. Net 2<br><br><b>1. Purchased<br/>2. Given for free</b>           | 460. Net 3<br><br><b>1. Purchased<br/>2. Given for free</b>           |
| How many children under 5 years slept under this net last night?                                                                                                                   | 453. Net 1 children under 5:<br>_____                                 | 457. Net 2 children under 5:<br>_____                                 | 461. Net 3 children under 5:<br>_____                                 |
